# Supplementary material for: Association between Body Mass Index and Renal Outcomes Modified by Chronic Kidney Disease and Anemia: The Obesity Paradox for Renal Outcomes
Source: MDPI journal article supplement (doi:10.3390/jcm11102787), 2022-05-15
Supplement: s1 [file s1]

**Supplementary Table S1. Multivariate linear regression for waist-to-hip ratio (WHR; per 0.05 increase)**

|                                    | Beta coefficient | 95% CI Beta coefficient | P value |
|------------------------------------|------------------|-------------------------|---------|
| Constant                           | 0.734            |                         |         |
| Age (years)                        | 0.002            | 0.001 to 0.002          | <0.001  |
| Gender (male vs female)            | -0.034           | -0.043 to -0.026        | <0.001  |
| eGFR (ml/min/1.73 m <sup>2</sup> ) | 0.000            | 0.000 to 0.000          | 0.159   |
| Uper log                           | 0.007            | -0.001 to 0.015         | 0.107   |
| Diabetes mellitus                  | 0.017            | 0.008 to 0.026          | <0.001  |
| Cardiovascular disease             | 0.007            | -0.002 to 0.016         | 0.144   |
| Glycosylated hemoglobin (%)        | 0.003            | 0.000 to 0.006          | 0.022   |
| Hemoglobin (g/dl)                  | 0.001            | 0.000 to 0.001          | <0.001  |
| Hemoglobin (g/dl)                  | 0.003            | 0.001 to 0.006          | 0.004   |
| in CKD 1-3                         | 0.005            | 0.002 to 0.008          | 0.002   |
| in CKD 4-5                         | 0.001            | -0.003 to 0.005         | 0.702   |
| Albumin (g/dl)                     | 0.002            | -0.007 to 0.010         | 0.688   |
| Cholesterol log                    | -0.005           | -0.040 to 0.030         | 0.777   |
| CRP ln                             | 0.006            | 0.002 to 0.010          | 0.005   |
| Phosphorus (mg/dl)                 | -0.003           | -0.007 to 0.001         | 0.177   |
| Uric acid (mg/dl)                  | 0.003            | 0.001 to 0.005          | 0.003   |
| Ferritin log                       | 0.000            | -0.009 to 0.008         | 0.918   |
| GPT (U/l)                          | 0.000            | 0.000 to 0.000          | 0.239   |
| Bicarbonate (mEq/l)                | -0.001           | -0.003 to 0.000         | 0.006   |

Abbreviations: WHR: waist-to-hip ratio, CI: confidence interval, eGFR: estimated glomerular filtration rate, Uper: urine protein and creatinine ratio, CKD: chronic kidney disease, CRP: C-reactive protein, GPT: glutamate pyruvate transaminase.
