# Supplementary material for: Association between Body Mass Index and Renal Outcomes Modified by Chronic Kidney Disease and Anemia: The Obesity Paradox for Renal Outcomes
Source: MDPI journal article supplement (doi:10.3390/jcm11102787), 2022-05-15
Supplement: s1 [file s1]

**Supplementary Table S4. Association between WHR, renal outcomes, and mortality according to Hb levels**

|                      |                | WHR               |                   |                  |                   |                   |
|----------------------|----------------|-------------------|-------------------|------------------|-------------------|-------------------|
|                      |                | Q1                | Q2                | Q3               | Q4                | Q5                |
| HR for renal outcome |                |                   |                   |                  |                   |                   |
| Hb $\geq$ 11 g/dl    | Unadjusted     | 0.88 (0.64-1.20)  | 1.15 (0.87-1.52)  | 1.22 (0.93-1.60) | 1 (reference)     | 1.15 (0.85-1.56)  |
|                      | Fully-adjusted | 1.47 (1.05-2.07)* | 1.33 (1.00-1.78)* | 1.24 (0.93-1.65) | 1 (reference)     | 1.06 (0.78-1.45)  |
| Hb < 11 g/dl         | Unadjusted     | 1.24 (1.04-1.47)* | 1 (reference)     | 1.01 (0.84-1.22) | 0.92 (0.76-1.10)  | 1.18 (0.98-1.41)  |
|                      | Fully-adjusted | 1.01 (0.84-1.20)  | 1 (reference)     | 1.01 (0.83-1.22) | 1.04 (0.86-1.26)  | 1.15 (0.95-1.40)  |
| HR for mortality     |                |                   |                   |                  |                   |                   |
| Hb $\geq$ 11 g/dl    | Unadjusted     | 1.29 (0.85-1.95)  | 1 (reference)     | 1.28 (0.87-1.89) | 1.89 (1.30-2.73)* | 2.60 (1.80-3.75)* |
|                      | Fully-adjusted | 1.24 (0.80-1.90)  | 1 (reference)     | 1.08 (0.72-1.60) | 1.29 (0.88-1.88)  | 1.38 (0.93-2.03)  |
| Hb < 11 g/dl         | Unadjusted     | 1.31 (0.99-1.74)  | 1.03 (0.76-1.40)  | 1 (reference)    | 1.57 (1.19-2.07)* | 1.96 (1.50-2.55)* |
|                      | Fully-adjusted | 1.45 (1.09-1.92)* | 1.12 (0.82-1.52)  | 1 (reference)    | 1.48 (1.12-1.97)* | 1.42 (1.08-1.86)* |

Values expressed as hazard ratio (HR) and 95% confidence interval (CI).

Fully adjusted model: adjusted for age, sex, eGFR, Upcr log, cardiovascular disease, smoking history, cancer, severe liver disease, and hypertension.

\* $P < 0.05$  compared with reference WHR category.

Renal outcomes are defined as renal replacement therapy and a 50% decline in eGFR.

Abbreviations: WHR: waist-to-hip ratio, Hb: hemoglobin, HR: hazard ratio, Upcr: urine protein and creatinine ratio.
