# Supplementary material for: Association between Body Mass Index and Renal Outcomes Modified by Chronic Kidney Disease and Anemia: The Obesity Paradox for Renal Outcomes
Source: MDPI journal article supplement (doi:10.3390/jcm11102787), 2022-05-15
Supplement: s1 [file s1]

**Supplementary Table S2. Association between BMI, renal outcomes, and mortality according to Hb levels among patients with CKD stage 4–5**

|                      |                | BMI (kg/m <sup>2</sup> ) |                   |                   |                   |                    |                    |
|----------------------|----------------|--------------------------|-------------------|-------------------|-------------------|--------------------|--------------------|
|                      |                | G1                       | G2                | G3                | G4                | G5                 | G6                 |
|                      |                | 15.0-20.0                | 20.0-22.5         | 22.5-25.0         | 25.0-27.5         | 27.5-30.0          | 30.0-35.0          |
| HR for renal outcome |                |                          |                   |                   |                   |                    |                    |
| Hb < 11 g/dl         | Unadjusted     | 1.22 (0.91-1.63)         | 1.06 (0.81-1.39)  | 1.12 (0.86-1.45)  | 1.11 (0.84-1.46)  | 1.01 (0.75-1.37)   | 1 (reference)      |
|                      | Fully-adjusted | 1.41 (1.05-1.90)*        | 1.09 (0.83-1.44)  | 1.12 (0.86-1.47)  | 1.09 (0.82-1.44)  | 1.01 (0.74-1.38)   | 1 (reference)      |
| Hb ≥ 11 g/dl         | Unadjusted     | 0.94 (0.44-1.99)         | 1 (reference)     | 1.04 (0.67-1.61)  | 1.17 (0.75-1.82)  | 1.26 (0.79-2.02)   | 1.41 (0.87-2.29)   |
|                      | Fully-adjusted | 2.54 (1.14-5.63)*        | 1 (reference)     | 2.12 (1.29-3.50)* | 1.97 (1.19-3.24)* | 3.04 (1.79-5.18)** | 2.64 (1.53-4.55)** |
| HR for mortality     |                |                          |                   |                   |                   |                    |                    |
| Hb < 11 g/dl         | Unadjusted     | 1.61 (1.03-2.52)*        | 1.45 (0.94-2.22)  | 1.33 (0.87-2.02)  | 1.17 (0.75-1.81)  | 1.35 (0.84-2.16)   | 1 (reference)      |
|                      | Fully-adjusted | 1.83 (1.15-2.90)*        | 1.57 (1.01-2.43)* | 1.26 (0.82-1.93)  | 1.13 (0.72-1.77)  | 1.14 (0.71-1.84)   | 1 (reference)      |
| Hb ≥ 11 g/dl         | Unadjusted     | 2.31 (0.75-7.09)         | 1.45 (0.49-4.34)  | 1.53 (0.52-4.55)  | 2.20 (0.74-6.50)  | 1 (reference)      | 2.15 (0.58-8.00)   |
|                      | Fully-adjusted | 3.25 (0.95-11.09)        | 1.37 (0.43-4.39)  | 1.32 (0.42-4.16)  | 1.41 (0.44-4.55)  | 1 (reference)      | 1.30 (0.31-5.38)   |

Values expressed as hazard ratio (HR) and 95% confidence interval (CI).

Fully adjusted model: adjusted for age, sex, eGFR, Upcr log, cardiovascular disease, smoking history, cancer, severe liver disease, and hypertension.

\* $P < 0.05$  compared with reference BMI category.

\*\* $P < 0.001$  compared with reference BMI category.

Renal outcomes are defined as renal replacement therapy and a 50% decline in eGFR.

Abbreviations: BMI: body mass index, Hb: hemoglobin, CKD: chronic kidney disease, HR: hazard ratio, Upcr: urine protein and creatinine ratio.
