# Supplementary material for: Association between Body Mass Index and Renal Outcomes Modified by Chronic Kidney Disease and Anemia: The Obesity Paradox for Renal Outcomes
Source: MDPI journal article supplement (doi:10.3390/jcm11102787), 2022-05-15
Supplement: s1 [file s1]

**Supplementary Table S3. Association between WHR, renal outcomes, and mortality according to CKD stage**

|                      |                | WHR                |                  |                  |                    |                    |
|----------------------|----------------|--------------------|------------------|------------------|--------------------|--------------------|
|                      |                | Q1                 | Q2               | Q3               | Q4                 | Q5                 |
| HR for renal outcome |                |                    |                  |                  |                    |                    |
| CKD 1-3              | Unadjusted     | 0.95 (0.65-1.37)   | 0.89 (0.62-1.28) | 1.03 (0.72-1.46) | 0.86 (0.60-1.25)   | 1 (reference)      |
|                      | Fully-adjusted | 1.33 (0.90-1.97)   | 1.20 (0.82-1.78) | 1.26 (0.88-1.82) | 1.02 (0.70-1.48)   | 1 (reference)      |
| CKD 4-5              | Unadjusted     | 1.35 (1.15-1.59)** | 1.03 (0.87-1.21) | 1 (reference)    | 0.97 (0.82-1.15)   | 1.21 (1.02-1.43)*  |
|                      | Fully-adjusted | 1.02 (0.86-1.21)   | 1.08 (0.91-1.28) | 1 (reference)    | 1.05 (0.89-1.25)   | 1.16 (0.97-1.38)   |
| HR for mortality     |                |                    |                  |                  |                    |                    |
| CKD 1-3              | Unadjusted     | 1.04 (0.69-1.57)   | 0.66 (0.42-1.04) | 0.74 (0.47-1.14) | 1 (reference)      | 1.43 (0.97-2.09)   |
|                      | Fully-adjusted | 1.82 (1.18-2.81)*  | 1.24 (0.77-1.99) | 1.07 (0.68-1.67) | 1 (reference)      | 1.27 (0.86-1.88)   |
| CKD 4-5              | Unadjusted     | 1.22 (0.94-1.57)   | 1.06 (0.82-1.39) | 1 (reference)    | 1.70 (1.33-2.17)** | 2.06 (1.63-2.61)** |
|                      | Fully-adjusted | 1.41 (1.09-1.83)*  | 1.21 (0.93-1.58) | 1 (reference)    | 1.56 (1.22-1.99)** | 1.40 (1.10-1.78)*  |

Values expressed as hazard ratio (HR) and 95% confidence interval (CI).

Fully adjusted model: adjusted for age, sex, eGFR, Upcr log, cardiovascular disease, smoking history, cancer, severe liver disease, and hypertension.

\* $P < 0.05$  compared with reference WHR category.

\*\* $P < 0.001$  compared with reference WHR category.

Renal outcomes are defined as renal replacement therapy and a 50% decline in eGFR.

Abbreviations: WHR: waist-to-hip ratio, CKD: chronic kidney disease, HR: hazard ratio, Upcr: urine protein and creatinine ratio.
